# Supplementary material
Source: PubMed Central journal article supplement (PMC3561782)
Supplement: supp_140.3.594_DEV082842.pdf [file supp_140.3.594_DEV082842.pdf]

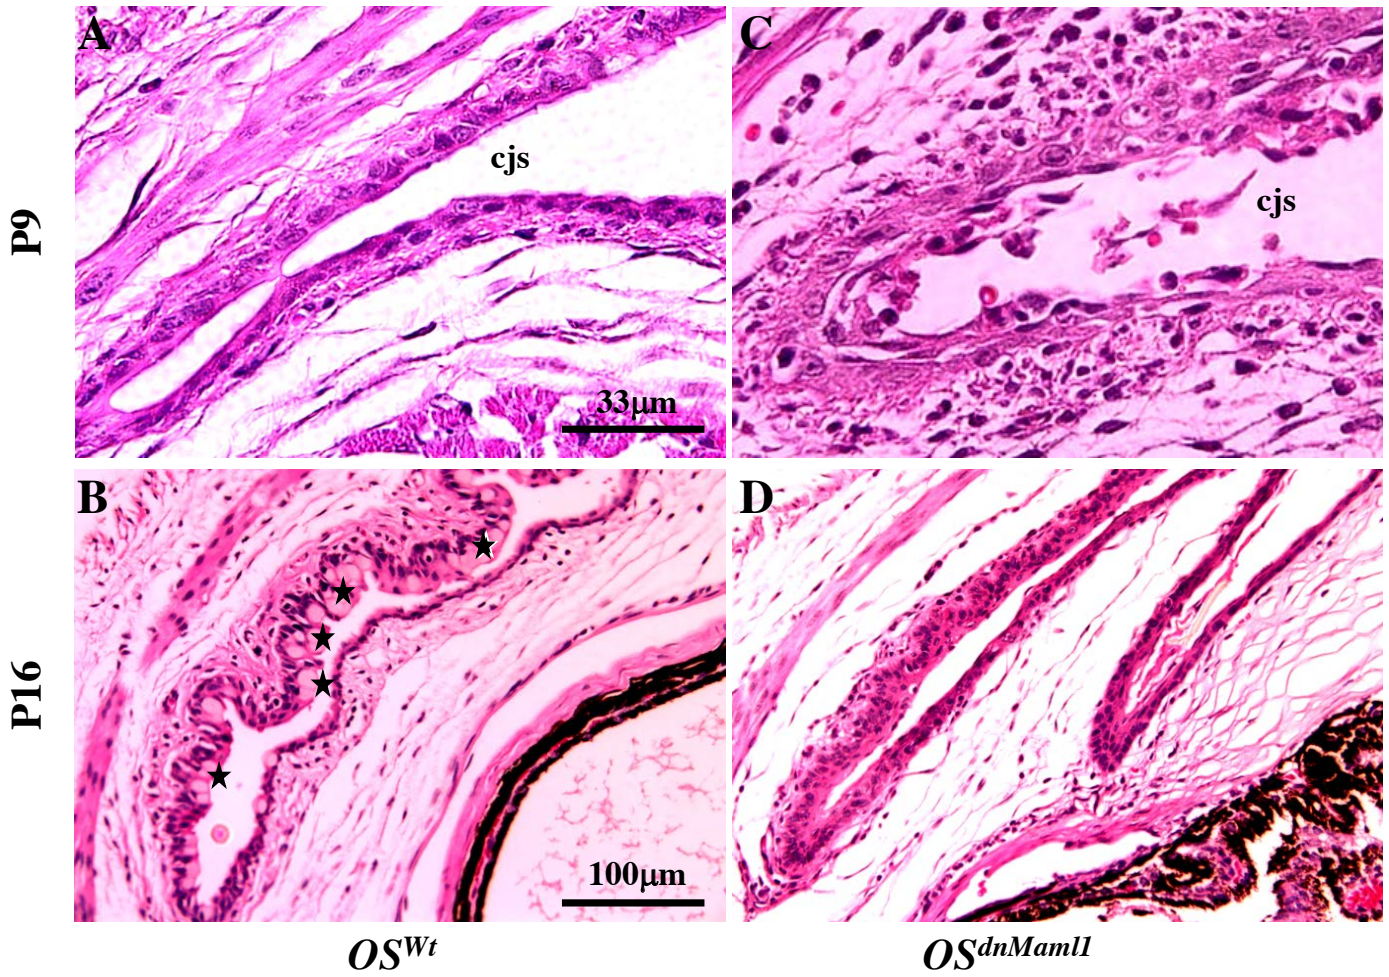

**Fig. S1. Expression of dnMam11 resulted in hyperplastic transformation in conjunctival epithelium.** (A-D) Hematoxylin and Eosin staining of the forniceal conjunctiva. Unlike *OS<sup>Wt</sup>* in bulbar conjunctiva, in which two layers of epithelial cells appeared at P9 (A) and subsequent goblet cell differentiation (asterisks in B) occurred at P16, dnMam11 expression resulted in hyperplasia but failed to form goblet cells at P16 (D). Abbreviation: cjs, conjunctival sac

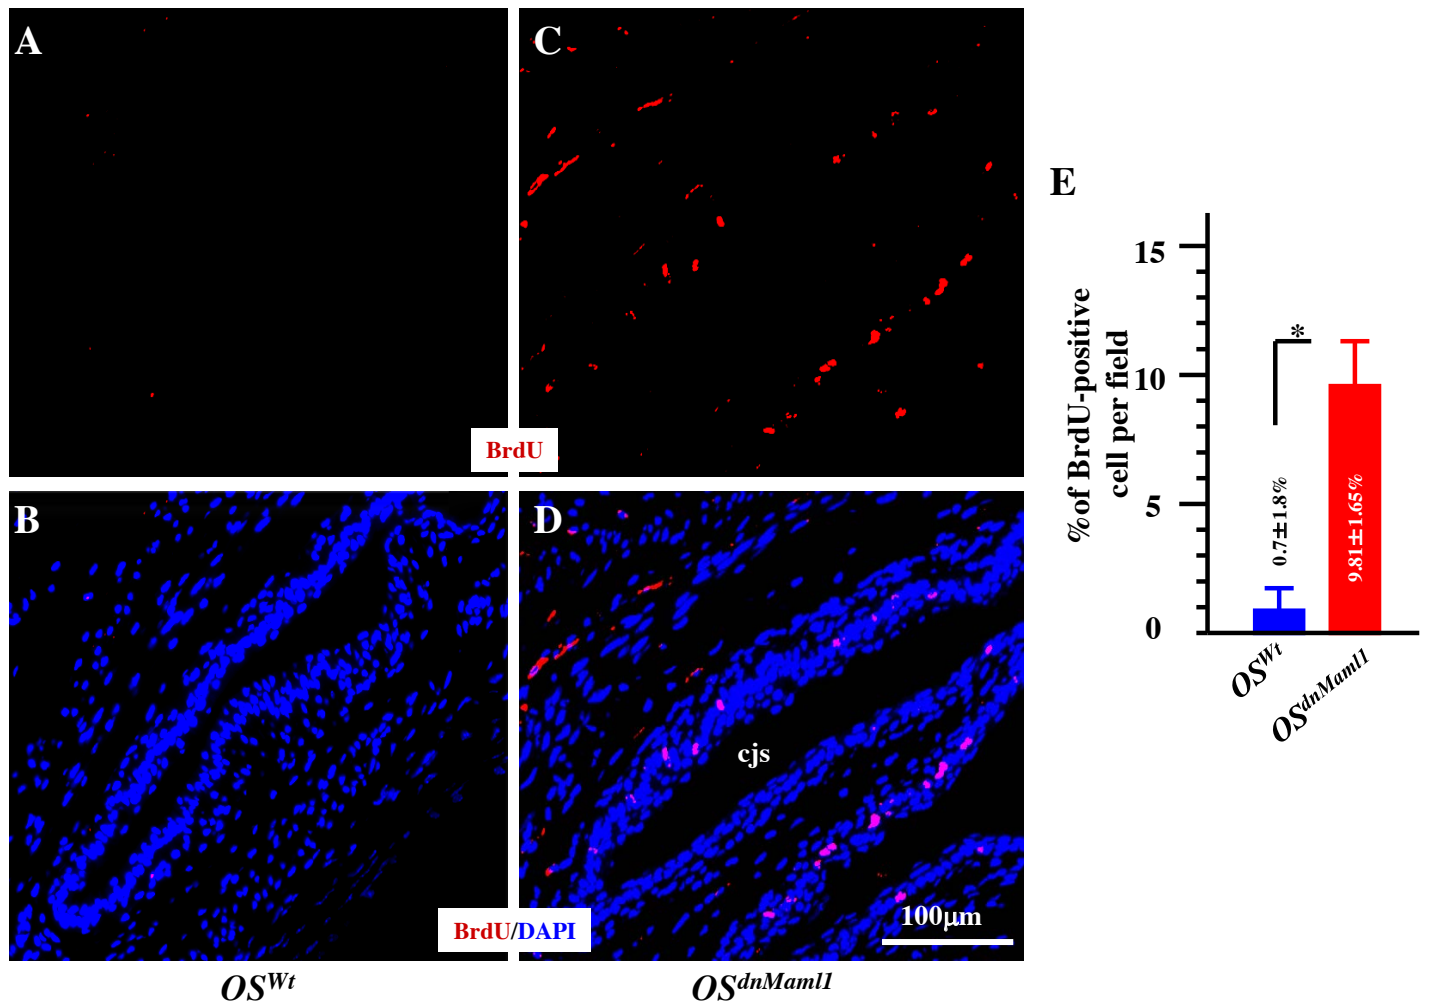

**Fig. S2. Expression of dnMam1 enhanced cell proliferation.** (A-E) Immunofluorescent staining (A-D) and quantitative histogram (E) revealed that *OS<sup>dnMAML1</sup>* (C,D) increased BrdU uptake by 14-fold when compared with an *OS<sup>Wt</sup>* littermate control (A,B). Abbreviation: cjs, conjunctival sac. \* $P < 0.05$ .



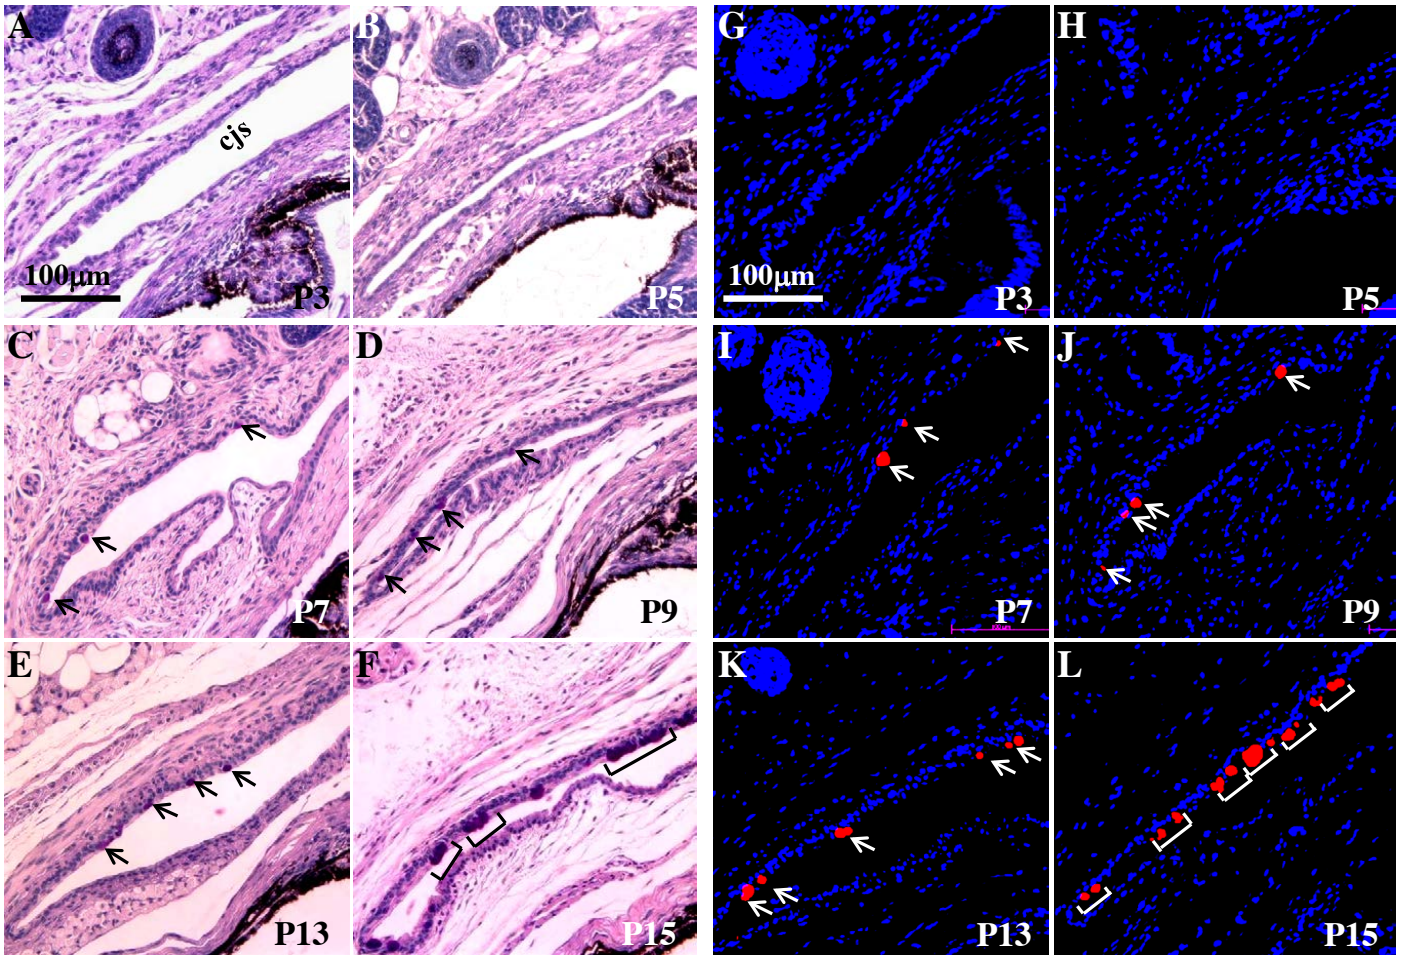

**Fig. S3. Time course of goblet cell differentiation during neonatal ages in normal mouse.** (A-L) PAS staining (A-F) and immunofluorescent staining of Muc5ac (G-L). Goblet cells started to emerge in bulbar conjunctival epithelium at P7 and formed clusters at P15. Abbreviation: cjs, conjunctival sac.



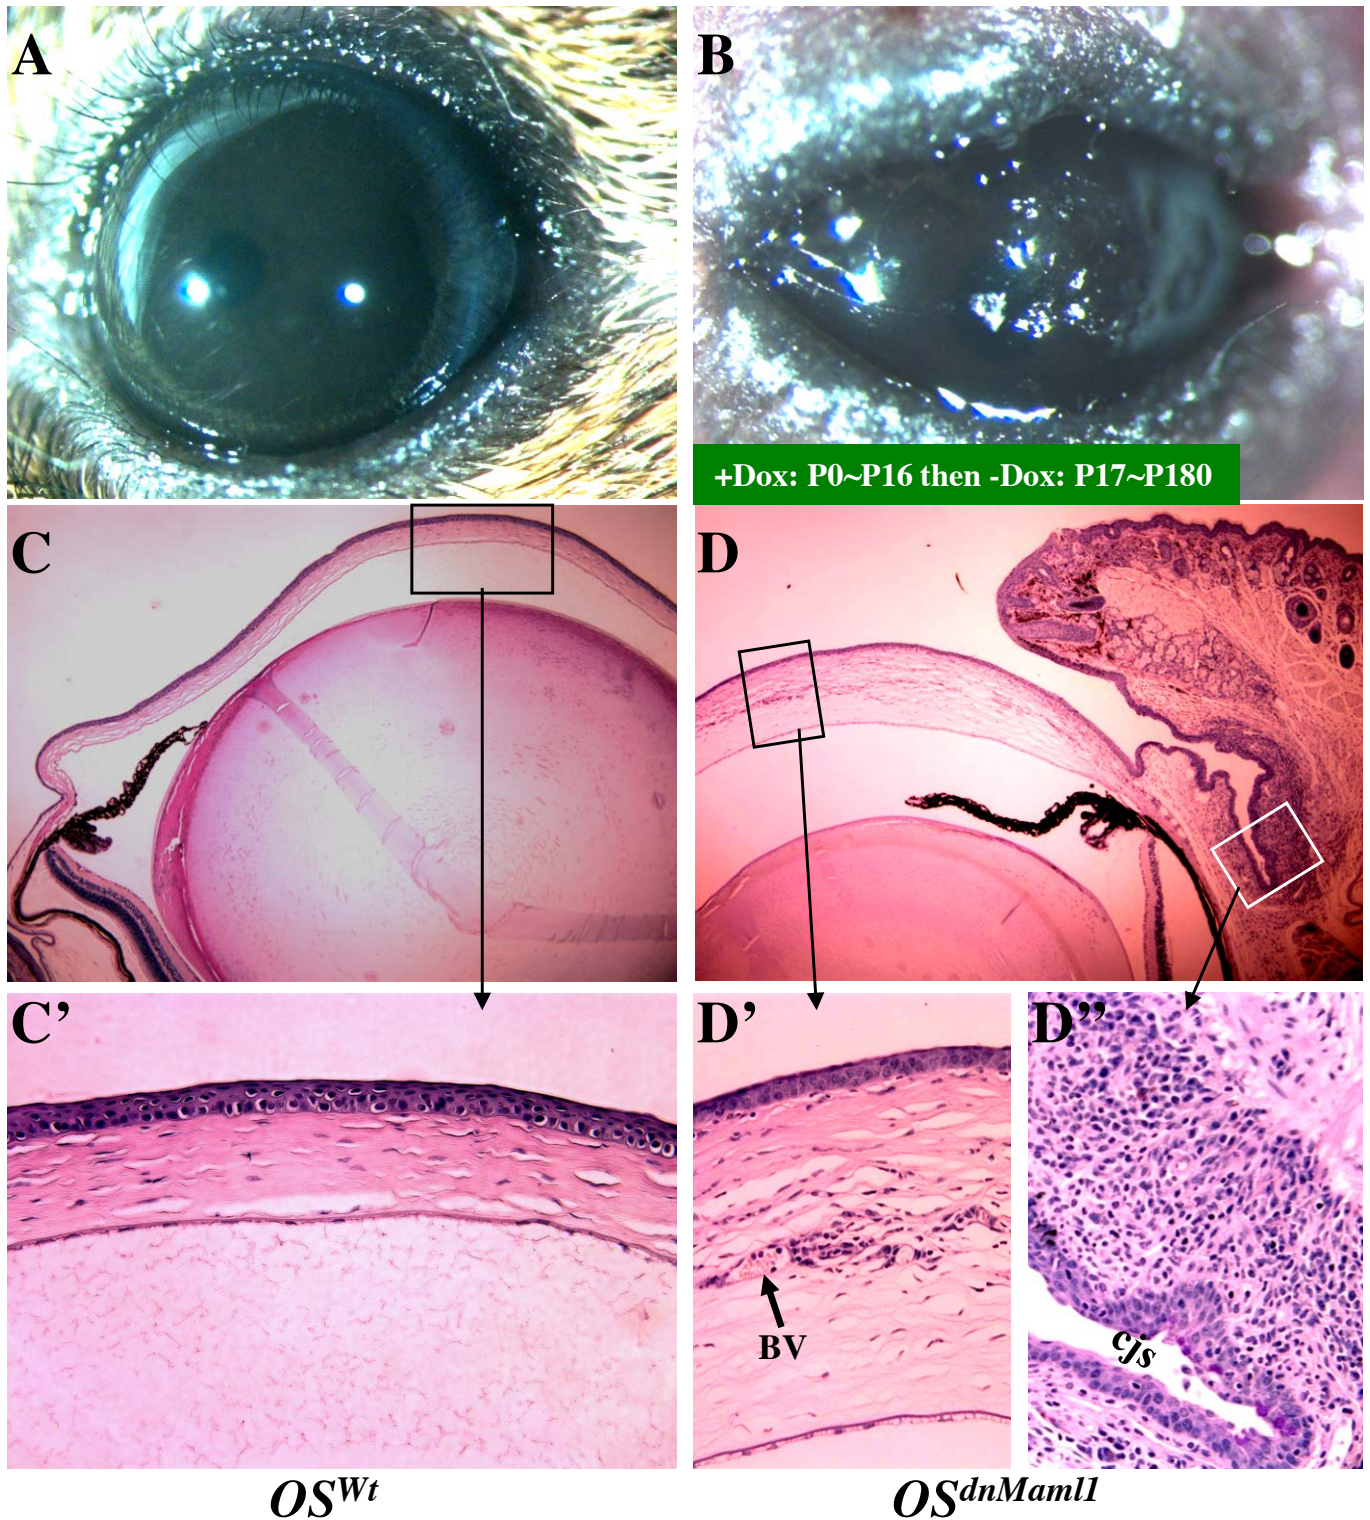

**Fig. S4. Expression of dnMam11 led to irreversible loss of goblet cells.** (A-D') *K14-rtTA/TC/Rosa<sup>dnMam11</sup>* mouse (B) and *TC/Rosa<sup>dnMam11</sup>* littermate (A) were fed with Dox from P0 to P16 and then changed to regular chow, without Dox, from P17 to P180. Severe ocular surface ulceration was observed in OS<sup>dnMam11</sup> (compare B with A). (C-D') Histological examinations demonstrated OS<sup>dnMam11</sup> led to persistent conjunctival squamous hyperplasia and corneal edema, inflammation and neovascularization (D', D'' are from the insets in D). Abbreviations: bv, blood vessel; cjs, conjunctival sac.

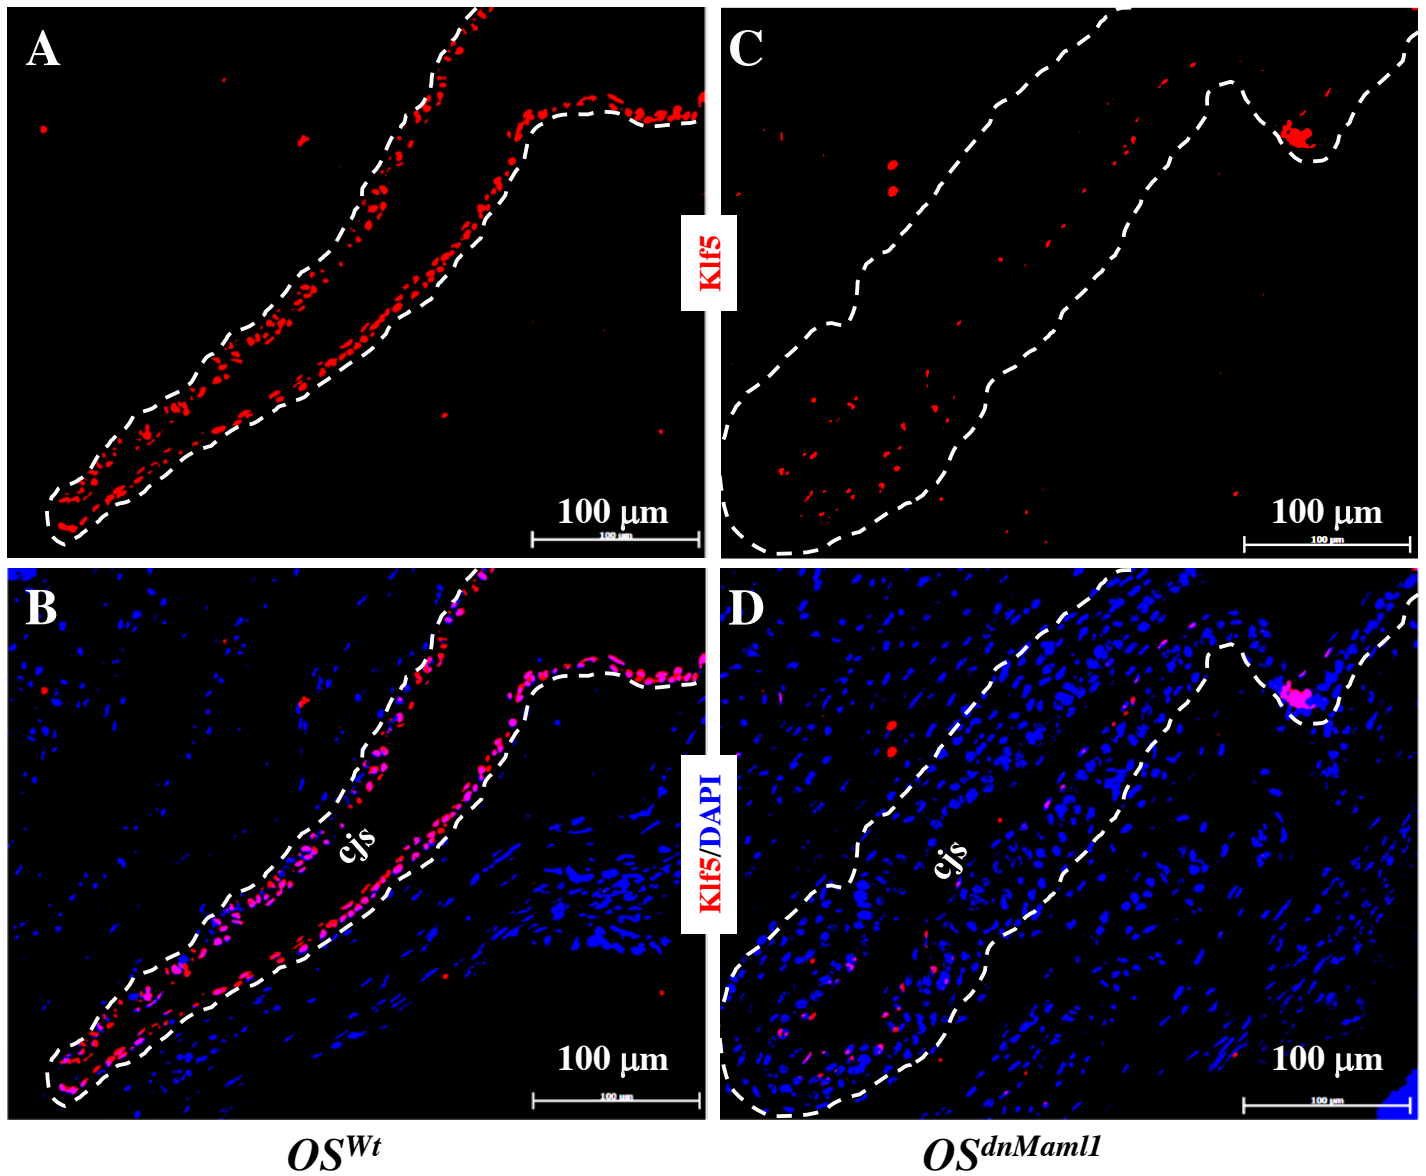

**Fig. S5.  $OS^{dnMam11}$  downregulated Klf5.** (A-D) Immunofluorescent staining showed that nuclear Klf5 expression decreased dramatically in  $OS^{dnMam11}$  (C,D) when compared with the  $OS^{Wt}$  (A,B) littermate at P9. Abbreviation: cjs, conjunctival sac.

**Table S1. List of antibodies used in this study**

| <b>Primary antibody</b>   | <b>Host</b> | <b>Source</b>                 | <b>Application</b> |
|---------------------------|-------------|-------------------------------|--------------------|
| Anti-RBP-Jκ               | Rabbit      | Ab25949, Abcam                | ChIP (1:200)       |
| Anti-Klf4                 | Goat        | AF3640, R&D System            | ChIP (1:200)       |
| Anti-Klf4                 | Goat        | AF3640, R&D System            | IHC (1:1000)       |
| Anti-GFP                  | Rabbit      | Ab290, Abcam                  | IHC (1:200)        |
| Anti-K10                  | Rabbit      | PRB159P, Covance              | IHC (1:100)        |
| Anti-K12                  | Rabbit      | Custom made (Liu et al, 1994) | IHC (2 µg/ml)      |
| Anti-K13                  | Rabbit      | Ab58744, Abcam                | IHC (1:100)        |
| Anti-K14                  | Rabbit      | PRB155-P, Covance             | IHC (1:1000)       |
| Anti-K15 (LHK15)          | Mouse       | MS-1068, Thermo Scientific.   | IHC (1:100)        |
| Anti-Pax-6                | Rabbit      | PRB-278P-100, Covance         | IHC (1:300)        |
| Anti-mucin5A/C (45M1)     | Mouse       | Ab3649, Abcam                 | IHC (1:500)        |
| Anti-p63 (4A4)            | Mouse       | Sc8431, Santa Cruz            | IHC (1:100)        |
| Anti-PCNA (PC10)          | Mouse       | Ab29, Abcam                   | IHC (1:500)        |
| Anti-BrdU (BRD.3)         | Mouse       | MS-1058-P, Fisher Scientific  | IHC (1:100)        |
| Anti-CD45 (F10-89-4)      | Mouse       | 05-1410, Millipore            | IHC (1:100)        |
| <b>Secondary antibody</b> |             |                               |                    |
| Anti-rabbit IgG Alexa488  | Goat        | Invitrogen                    | IHC (1:500)        |
| Anti-rabbit IgG Alexa555  | Goat        | Invitrogen                    | IHC (1:500)        |
| Anti-mouse IgG Alexa555   | Rabbit      | Invitrogen                    | IHC (1:500)        |
| Anti-goat IgG Alexa555    | Donkey      | Invitrogen                    | IHC (1:500)        |

IHC, immunohistochemistry; ChIP, chromosome immunoprecipitation

**Table S2. Primer information for the PCR**

| <b>Primer name</b> | <b>Primer sequence</b>                                                | <b>size (bp)</b> | <b>Application</b> |
|--------------------|-----------------------------------------------------------------------|------------------|--------------------|
| mMamL-1            | Forward 5' GCACAGCGCGGTCATGGAGC<br>Reverse 5' GCGCTTGGCCTTGGCCTGGA    | 166              | RT-qPCR            |
| mHey-1             | Forward 5' GCTGAGATCTTGCAGATGAC<br>Reverse 5' CAACTTCGGCCAGGCATTCC    | 133              | RT-qPCR            |
| mHes-1             | Forward 5' GTCAACACGACACCGGACAA<br>Reverse 5' CCTTCGCCTCTTCTCCATGA    | 81               | RT-qPCR            |
| mKlf4              | Forward 5' TCAAGGCACACCTGCGAACT<br>Reverse 5' TGCGGTAGTGCCTGGTCAGT    | 108              | RT-qPCR            |
| mGapdh             | Forward 5' AAGGTGGTGAAGCAGGCATCT<br>Reverse 5' TCTTACTCCTTGGAGGCCATGT | 232              | RT-qPCR            |
| KLF4-hMuc5A/Cpr    | Forward 5' GAGAGTCTAGGGTGGGGTATGT                                     | 203              | ChIP assay         |
| KLF4-hMuc5A/Cpr    | Reverse 5' CAGCCCCGTGCTTCACGTGGGT                                     |                  |                    |
| Rbpj-mKLF4pr       | Forward 5' CTCAATCCTAGCTTTCCAAGCC                                     | 150              | ChIP assay         |
| Rbpj-mKLF4pr       | Reverse 5' ATTCCCTTGGAAGTGGCCAGT                                      |                  |                    |
